# Supplementary material for: Hyperaminoacidemia from interrupted glucagon signaling increases pancreatic acinar cell proliferation and size via mTORC1 and YAP pathways
Source: PubMed Central journal article supplement (PMC11667045; doi:10.1016/j.isci.2024.111447), 2024-11-22
Supplement: mmc1.pdf [file mmc1.pdf]

## **Supplemental information**

### **Hyperaminoacidemia from interrupted glucagon signaling increases pancreatic acinar cell proliferation and size via mTORC1 and YAP pathways**

**Chunhua Dai, Yue Zhang, Yulong Gong, Amber Bradley, Zihan Tang, Katelyn Sellick, Shristi Shrestha, Erick Spears, Brittney A. Covington, Jade Stanley, Regina Jenkins, Tiffany M. Richardson, Rebekah A. Brantley, Katie Coate, Diane C. Saunders, Jordan J. Wright, Marcela Brissova, E. Danielle Dean, Alvin C. Powers, and Wenbiao Chen**

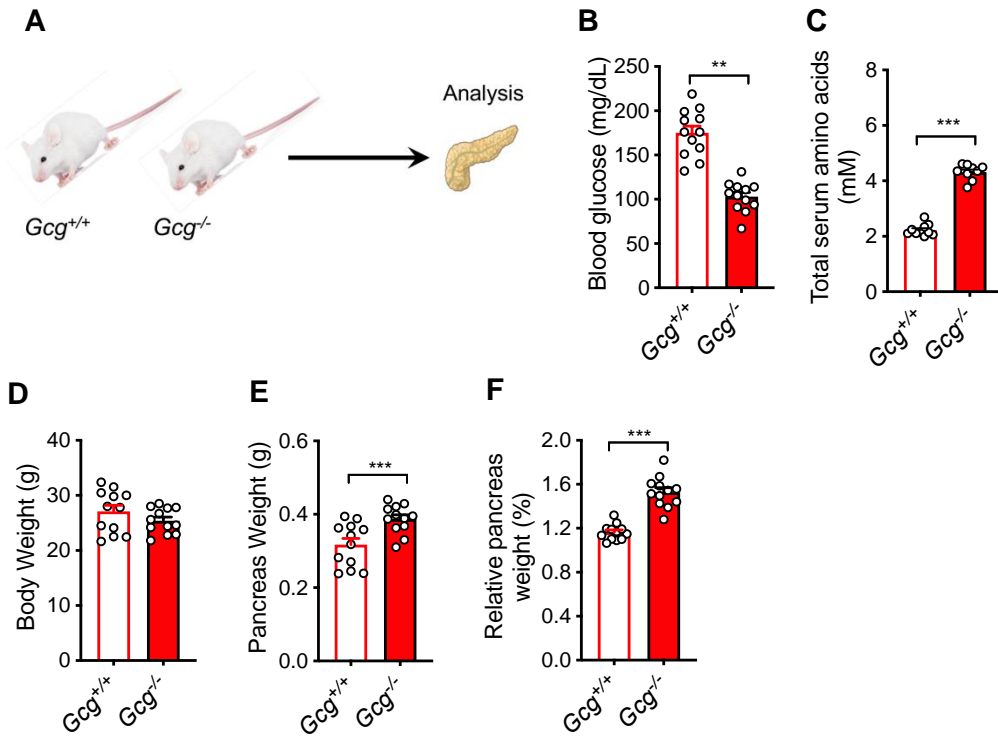

**Figure S1. Interruption of glucagon signaling increases total amino acid levels in blood and pancreas weight in *Gcg*<sup>-/-</sup> mouse model.** (A) Model 1, *Gcg*<sup>+/+</sup> and *Gcg*<sup>-/-</sup> mice. (B) Random blood glucose; (C) Total serum amino acid levels; (D) Body weight, (E) Absolute pancreas weight; (F) Relative pancreas weight (% of absolute pancreas weight/body weight). N=12 mice/group. \* p<0.05, \*\* p<0.01, \*\*\* p<0.001. Data represent means  $\pm$  SEM in all figures.

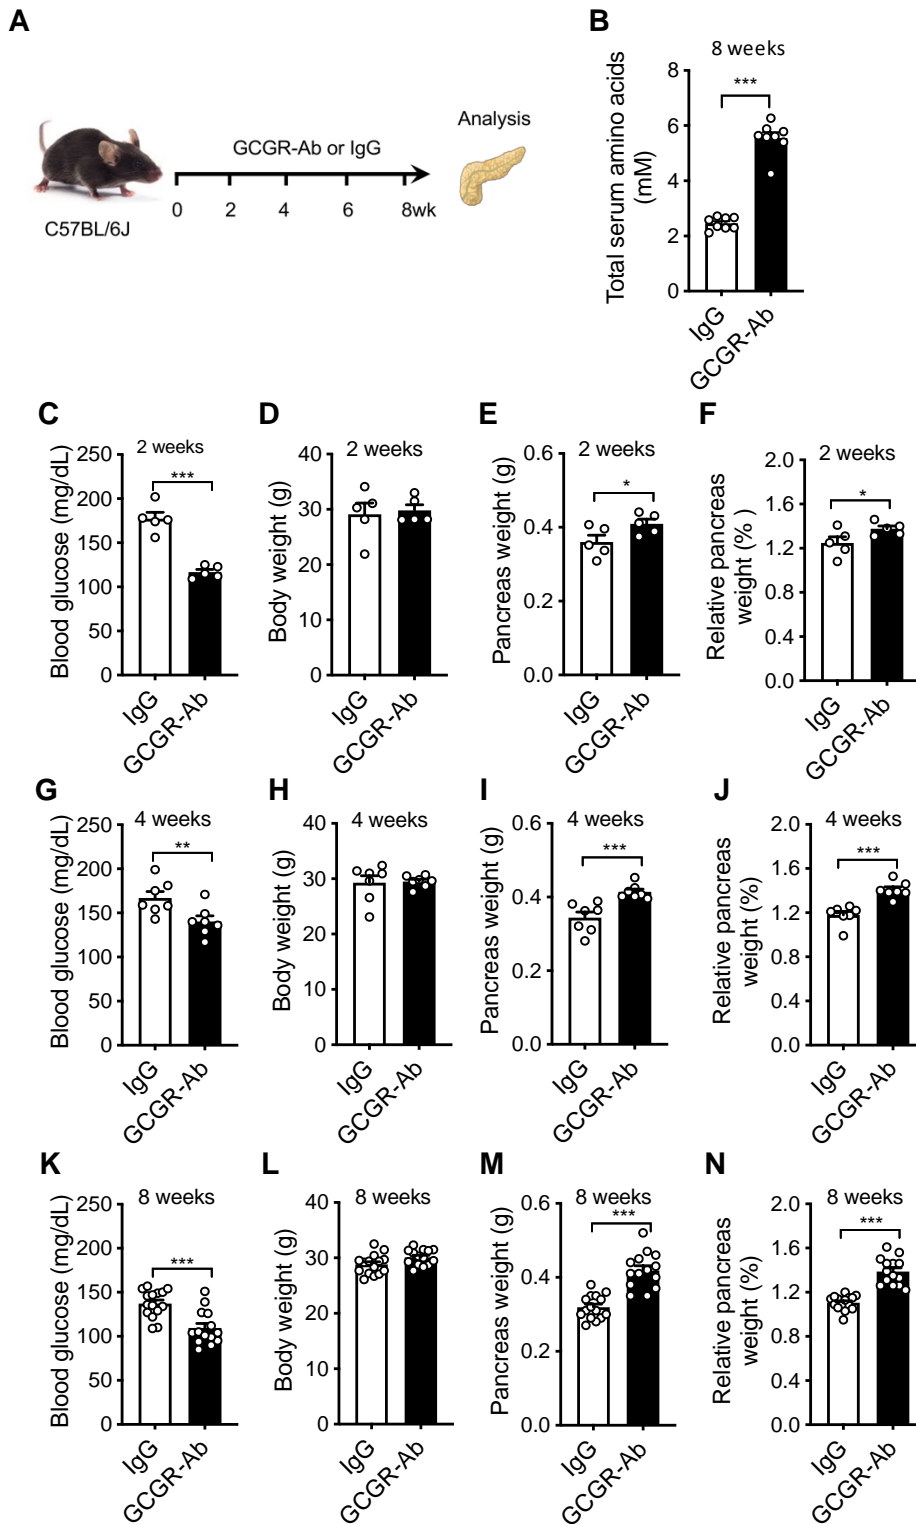

**Figure S2. Interruption of glucagon signaling increases total amino acid levels in blood and pancreas weight in mice treated with GCGR-Ab.** (A) Model 2, C57BL/6J mice treated with GGR-Ab to block glucagon signaling. (B) Total serum amino acid levels in blood; (C-F) 2 weeks treatment; (G-J) 4 weeks treatment; (K-N) 8 weeks treatment; (C,G,K) Blood glucose; (D,H,L) Body weight; (E,I,M) Absolute pancreas weight; (F,J,N) Relative pancreas weight (% of absolute pancreas weight/body weight). N=6-14 mice/group \*  $p < 0.05$ , \*\*  $p < 0.01$ , \*\*\*  $p < 0.001$

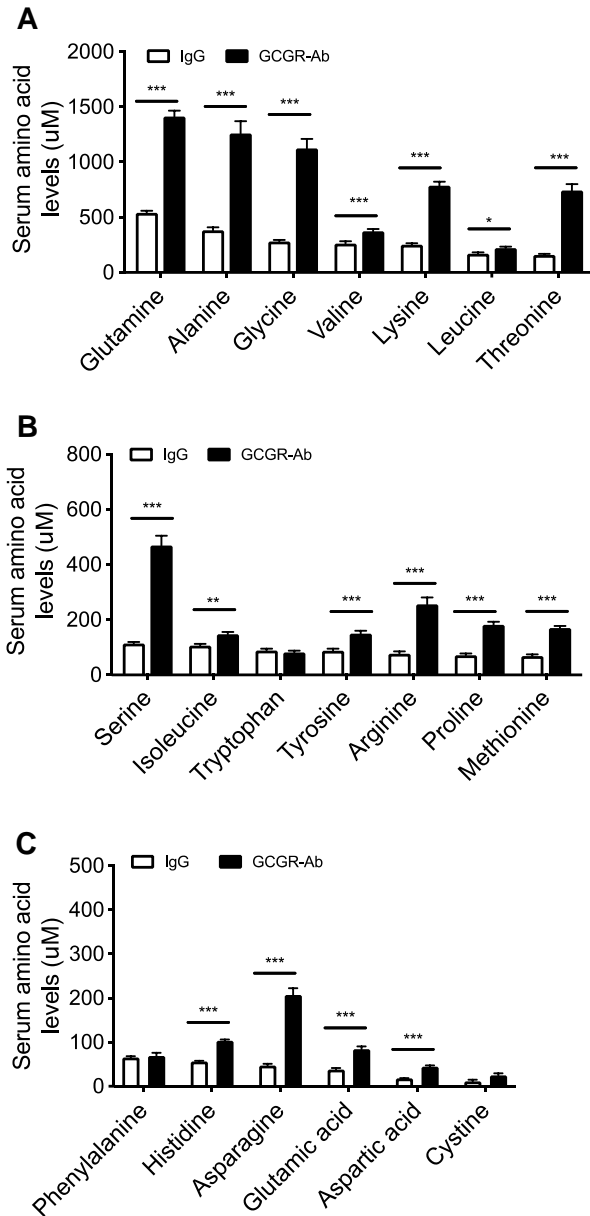

**Figure S3. GCGR-Ab treatment increases most amino acids in blood (AAs).** (A) high concentration AAs; (B) medium concentration AAs; (C) low concentration AAs. N=8 mice/group. \*  $p < 0.05$ , \*\*  $p < 0.01$ , \*\*\*  $p < 0.001$

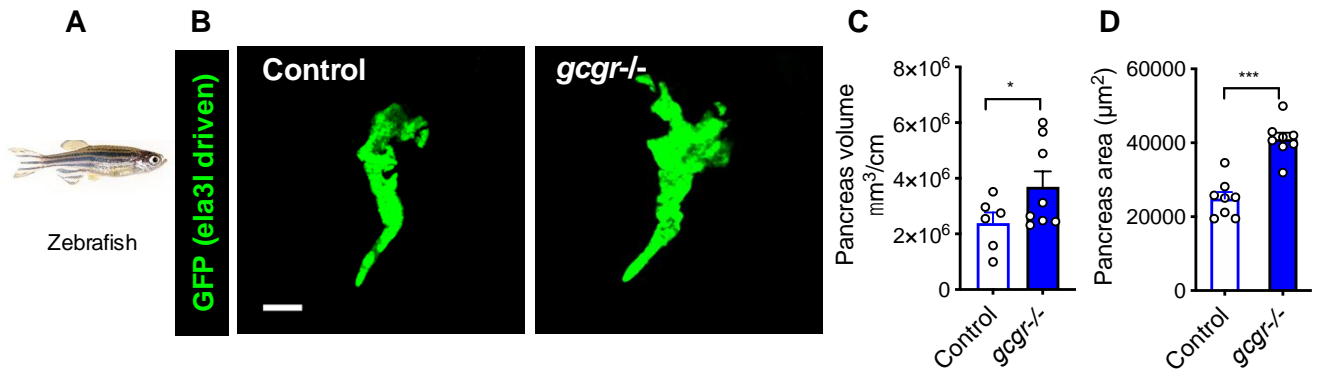

**Figure S4. Interruption of glucagon signaling increases pancreas mass in *Gcgr*<sup>-/-</sup> zebrafish.** (A) Model 3, *gcgr*<sup>+/+</sup> (control) and *gcgr*<sup>-/-</sup> zebrafish. (B) Representative of pancreas images from *ela3l*:GFP fish at 18 dpf; (C,D) Pancreas volume and area in *gcgr*<sup>-/-</sup> and control zebrafish. N=6-8/group. \* p<0.05, \*\* p<0.01, \*\*\* p<0.001

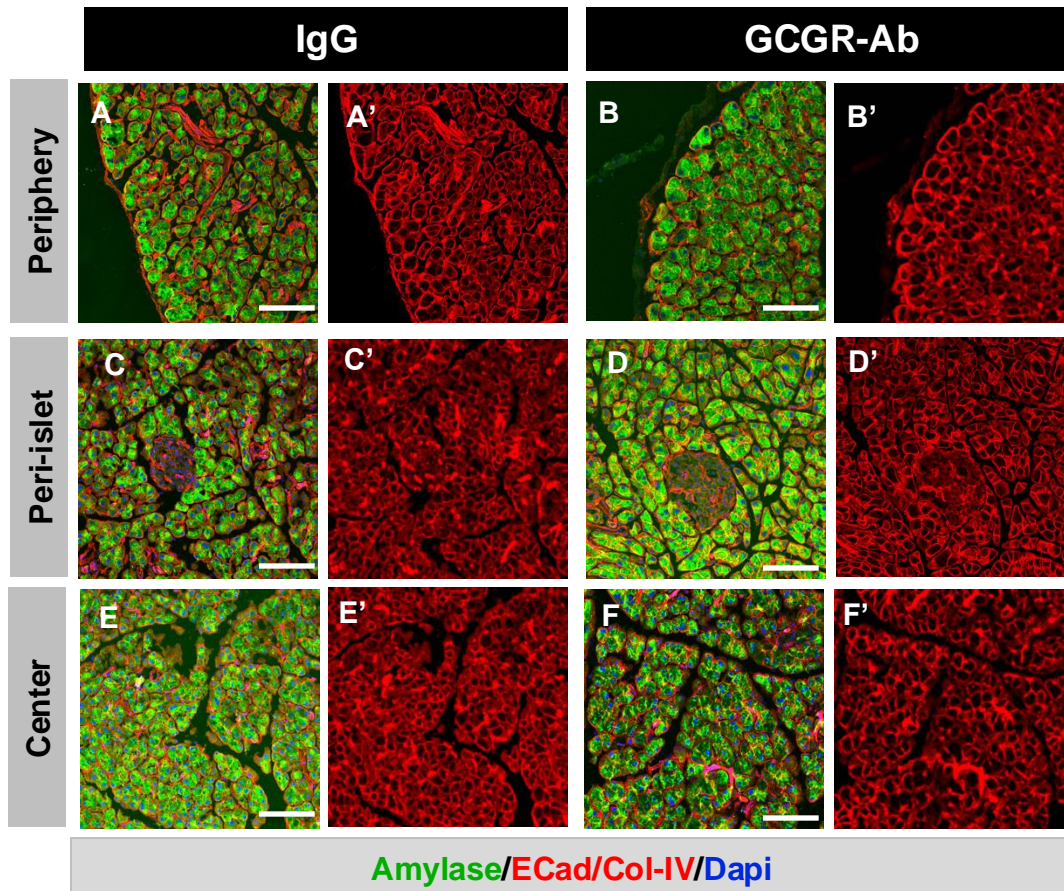

**Figure S5. Interruption of glucagon signaling increases acinar cell size in all pancreas regions.** Representative immunofluorescence images of acinar cell size from IgG (A,C,E) and GCGR-Ab (B,D,F) treated mice (8 weeks). (A,B) Periphery area, (C,D) Peri-islet area, (E,F) Center region. Green, amylase; red, E-Cadherin+Col-IV (cell border markers); blue, DAPI. (A',B',C',D',E',F') only show cell borders for better viewing of cell size. Scale bar=100  $\mu$ m.

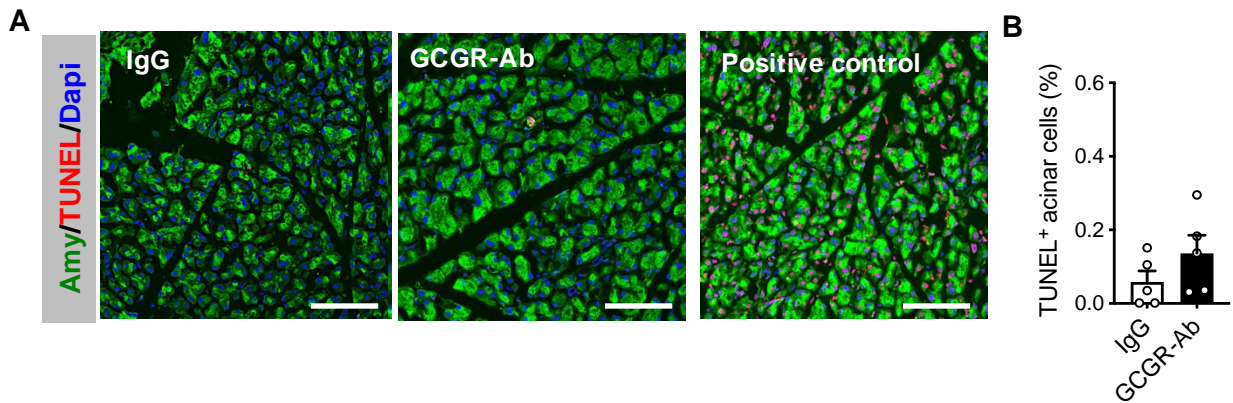

**Figure S6. Interruption of glucagon signaling does not induce apoptosis. (A)** Representative images of TUNEL assay. DNase I treated samples are included as positive controls. Scale bar=100  $\mu$ m. **(B)** Quantification of TUNEL positive acinar cells.

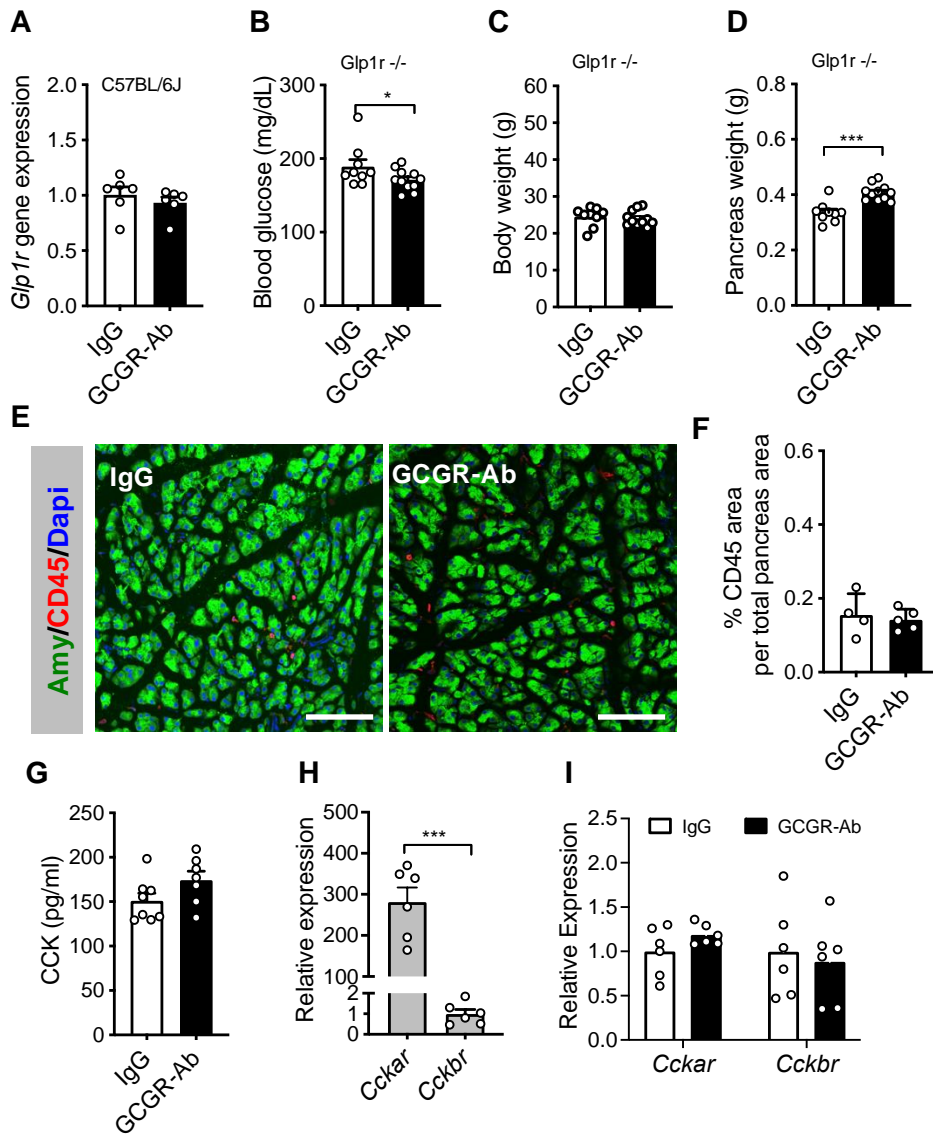

**Figure S7. IGS induced pancreas expansion is independent of GLP1, pancreatitis, and CCK.**

(A) Relative expression of *Glp1r* gene in the acinar cells of C57BL/6J mice treated with IgG or GCGR-Ab. N=6/group. (B,C,D) Glucose, body weight, and absolute pancreas weight in the *GLP1*<sup>-/-</sup> mice treated with GCGR-Ab or IgG for 8 weeks. N=8-14/group. (E) Representative images of CD45 immunofluorescence in IgG or GCGR-Ab treated C57BL/6J pancreas section. Green, amylase; red, CD45; blue, DAPI. Scale bar=100μm. (F) Quantification of CD45 positive area in pancreas sections. N=4-5/group. (G) CCK concentrations in blood in the C57BL/6J mice treated with IgG or GCGR-Ab for 8 weeks. N=6-8/group (H) Relative expressions of *Cckar* and *Cckbr* gene in C57BL/6J mice. N=6/group (I) Comparison of *Cckar* and *Cckbr* gene expression in C57BL/6J mice treated with GCGR-Ab. N=6-7/group. \* p<0.05, \*\* p<0.01, \*\*\* p<0.001



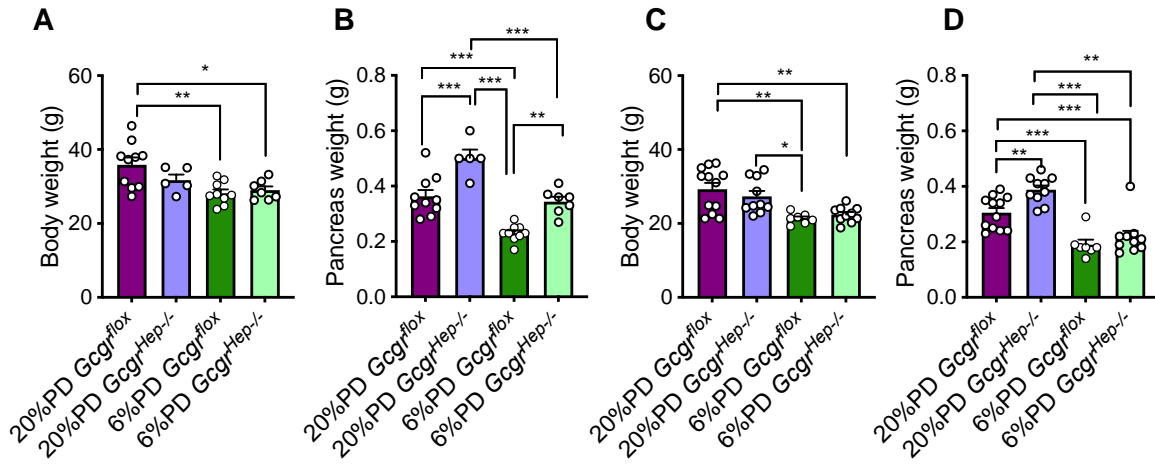

**Figure S8. Phenotypes of *Gcgr(hep)*<sup>-/-</sup> on low protein.** (A, B) Body weight and pancreas weight in *Gcgr(hep)*<sup>-/-</sup> with 20% or 6% protein diet from 22 to 40 weeks of age; (C,D) Body weight and absolute pancreas weight in *Gcgr(hep)*<sup>-/-</sup> with 20% or 6% protein diet for 3 to 17 weeks of age. N=5-12 mice/group. \* p < 0.05, \*\* p < 0.01, \*\*\* p < 0.001

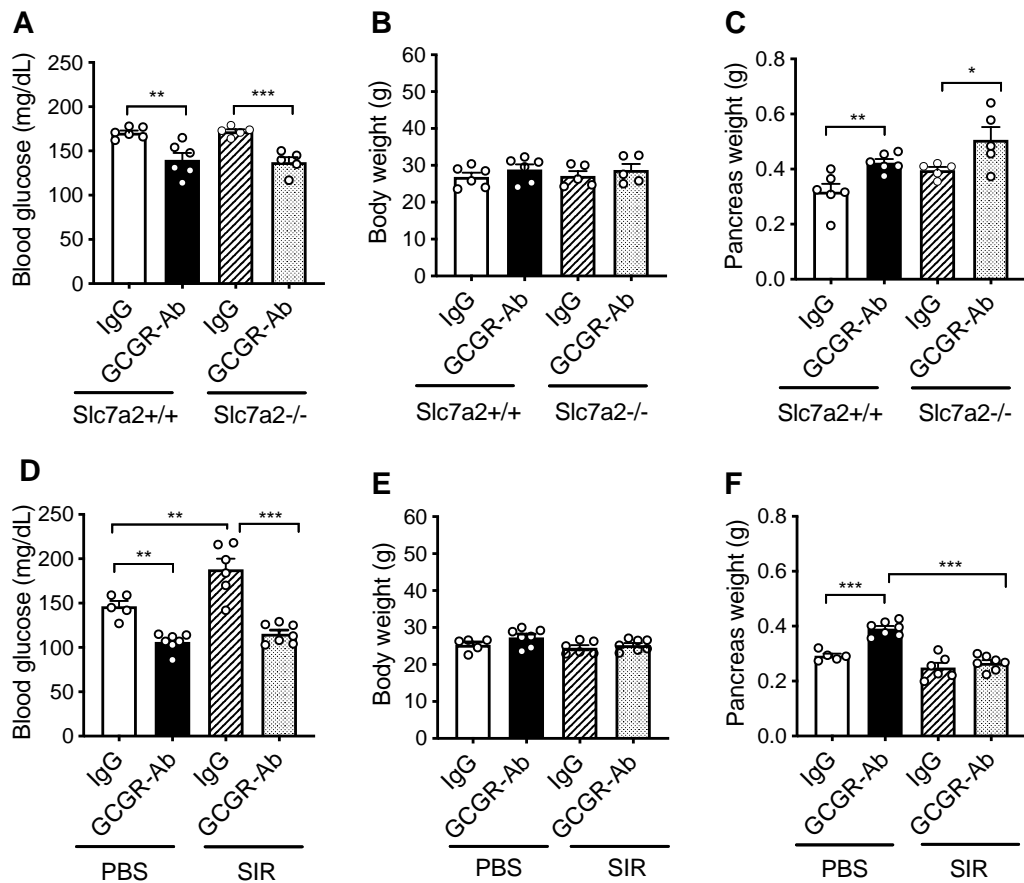

**Figure S9. Phenotypes of *Slc7a2* and sirolimus treatment.** (A,B,C) *Slc7a2*<sup>+/+</sup> and *Slc7a2*<sup>-/-</sup> mice treated with IgG or GCGR-Ab for 8 weeks. N=5-6/group. (D,E,F) C57BL/6J mice treated with IgG or GCGR-Ab and with or without sirolimus for 4 weeks. N=5-6/group. (A,D) Blood glucose; (B,E) Body weight; (C, F) Absolute pancreas weight. \* p<0.05, \*\* p<0.01, \*\*\* p<0.001

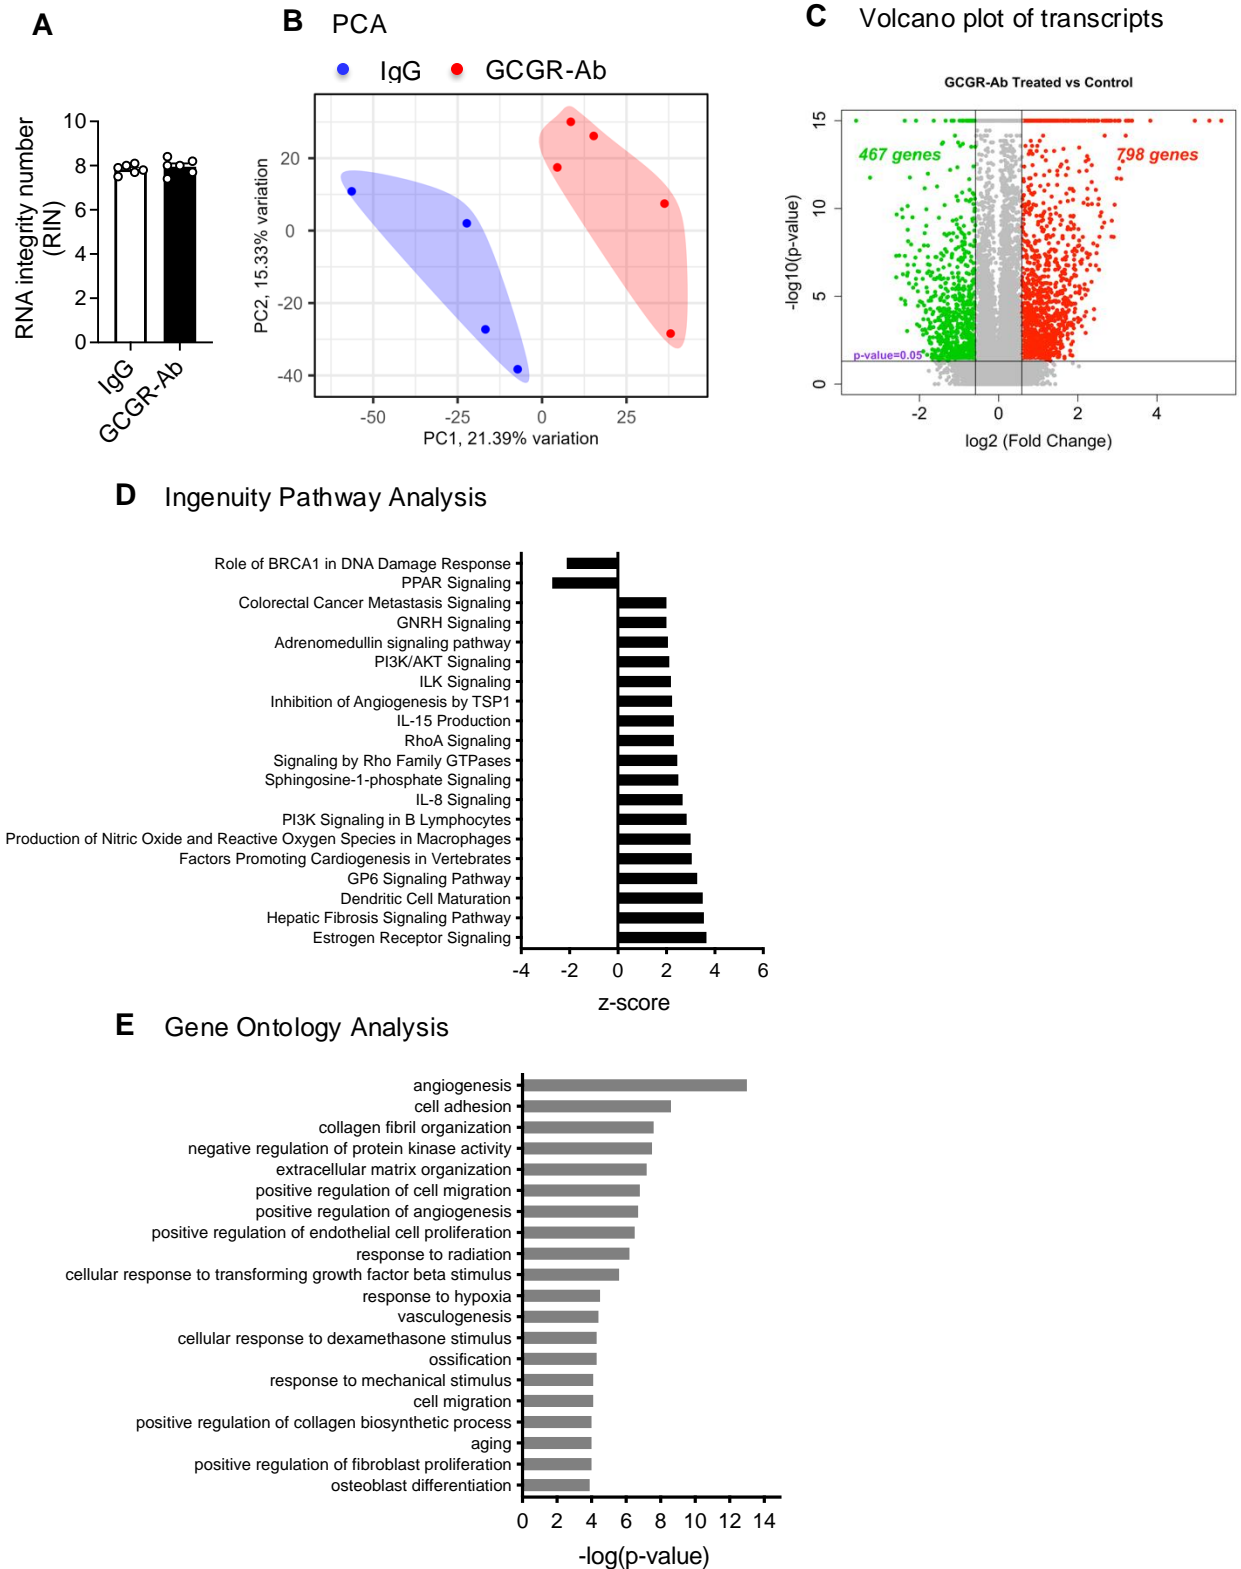

**Figure S10. Acinar cell RNAseq analysis.** RNAs were isolated from C57BL/6J mice treated with IgG or GCGR-Ab for 8 weeks. (A) RNAs used in this project are high quality (RIN 7.4 to 8.4). (B) Principle component analysis of the RNAseq datasets. (C) Volcano plot of differentially expressed transcripts. (D) Ingenuity pathway analysis. (E) Gene ontology analysis.

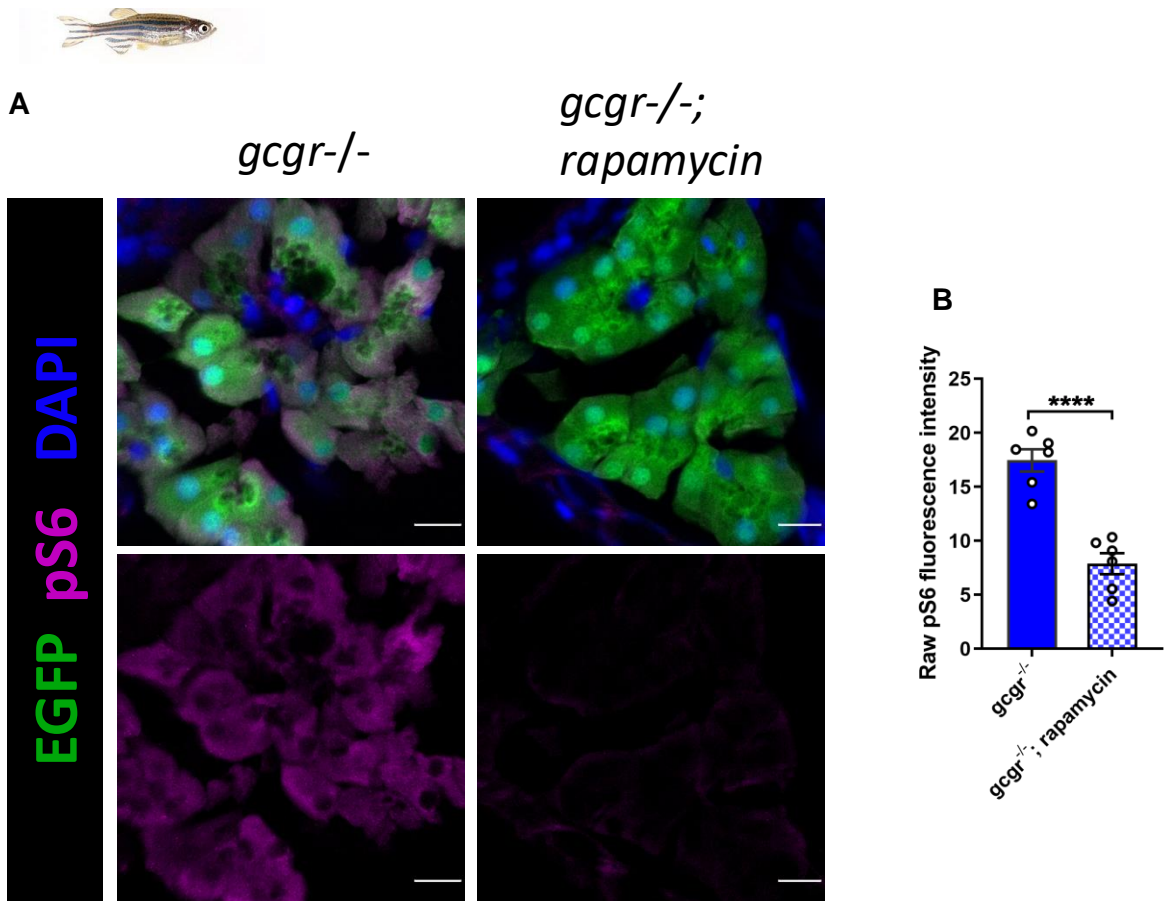

**Figure S11. Validation of rapamycin treatment.** (A) Representative immunofluorescence images of pS6(240/244) in pancreas sections from fish treated with vehicle or 100 nM rapamycin for 24 hours. All fish carry the Tg(ela3l:EGFP) transgene that labels acinar cells with EGFP (scale bar, 10  $\mu$ m). (B) Quantification of raw pS6 signal intensity in acinar cells of these fish.

**Supplemental Table 1: AA transporter genes in zebrafish acinar cells**

| <b>Gene Symbol</b> | <b>Normalized Counts</b> |
|--------------------|--------------------------|
| <i>slc1a4</i>      | 32717.87                 |
| <i>slc38a5b</i>    | 20692.85                 |
| <i>slc38a2</i>     | 9693.06                  |
| <i>slc1a3a</i>     | 5756.60                  |
| <i>slc25a22</i>    | 4856.41                  |
| <i>slc43a1b</i>    | 4634.98                  |
| <i>slc3a2b</i>     | 3214.39                  |
| <i>slc7a10a</i>    | 3066.04                  |
| <i>slc3a2a</i>     | 2590.99                  |
| <i>slc16a10</i>    | 2572.65                  |
| <i>slc7a2</i>      | 2173.45                  |
| <i>slc7a3a</i>     | 2161.57                  |
| <i>slc43a1a</i>    | 1441.10                  |
| <i>slc17a7</i>     | 1165.84                  |
| <i>slc38a10</i>    | 880.20                   |
| <i>slc38a4</i>     | 605.26                   |
| <i>slc15a4</i>     | 568.33                   |
| <i>slc38a7</i>     | 530.70                   |
| <i>slc38a3b</i>    | 384.51                   |
| <i>slc3a1</i>      | 196.00                   |
| <i>slc6a20</i>     | 147.49                   |
| <i>slc7a14a</i>    | 122.55                   |
| <i>slc43a2a</i>    | 85.54                    |
| <i>slc36a1</i>     | 83.94                    |
| <i>slc43a2b</i>    | 82.46                    |
| <i>slc7A8b</i>     | 48.78                    |
| <i>slc7a7</i>      | 30.34                    |
| <i>slc38a5a</i>    | 7.88                     |

## Supplemental Table 2: Primers used in CRISPR/Cas9 mutagenesis in zebrafish

| Gene name       | Target sequence | Forward genotyping primer | Reverse genotyping primer |
|-----------------|-----------------|---------------------------|---------------------------|
| <i>slc38a5b</i> | sgRNA1          | ggACCTCAGCAATGCCATCA      | AGTGATGGAGGAAAAACCCCTC    |
|                 | sgRNA2          | ggCGAGCGTTTGGACACCCG      | GCATGTGAAGATTTGTGCCAT     |
| <i>yap1</i>     | sgRNA1          | GGAAGTATCTCTGTCCCGAA      | GCCAGTCCTCTTACGAGATACC    |
|                 | sgRNA2          | gGGTCCTCTTCCTGACGGGT      | TTGGAACAAGTAAAGGGGTGAG    |
| <i>taz</i>      | sgRNA1          | GgAGGACTGGTGCCGGGTGT      | CTCCTGGAGGAACAAGGATATG    |
|                 | sgRNA2          | GgGATGGCCTTCACCCCAA       | AGACTCCACTCCCACACC        |

GG at the 5' end of sgRNA is necessary for efficient transcription by T7 RNA polymerase.  
Lower case g indicates a mismatch with genomic DNA.

## Supplemental Table 3: IGS models

| Model                        | Control genotype (if applicable)          | Treatment                                 | Blood glucose          | CCK | Serum AAs | Pancreas size | Acinar cell size | Acinar cell proliferation | Gene expression | pS6 IHC | Yap IHC |   |
|------------------------------|-------------------------------------------|-------------------------------------------|------------------------|-----|-----------|---------------|------------------|---------------------------|-----------------|---------|---------|---|
| Mouse                        | <i>Gcgr<sup>-/-</sup></i>                 | <i>Gcgr<sup>+/+</sup></i>                 | -                      | ●   |           | ●             | ●                | ●                         | ●               |         | ●       | ● |
|                              | C57BL/6J                                  | -                                         | IgG/GCGR-Ab            | ●   | ●         | ●             | ●                | ●                         | ●               | ●       | ●       | ● |
|                              |                                           |                                           | IgG/GCGR-Ab; PBS/SIR   |     |           |               | ●                | ●                         |                 |         |         |   |
| <i>Gcgr<sup>hep-/-</sup></i> | <i>Gcgr<sup>fllox</sup></i>               | 20%PD, 6%PD                               |                        |     | ●         | ●             |                  |                           |                 |         |         |   |
| Zebrafish                    | <i>gcgr<sup>-/-</sup>; tg(ela3l:EGFP)</i> | <i>gcgr<sup>+/+</sup>; tg(ela3l:EGFP)</i> | -                      |     |           |               | ●                | ●                         | ●               |         |         |   |
|                              |                                           |                                           | <i>slc38a5b</i> -sgRNA |     |           |               |                  | ●                         | ●               |         |         | ● |
|                              |                                           |                                           | <i>taz</i> -sgRNA      |     |           |               |                  | ●                         | ●               |         |         |   |
|                              |                                           |                                           | <i>yap</i> -sgRNA      |     |           |               | ●                | ●                         |                 | ●       |         |   |

Ab, antibody; AAs, amino acids; IHC, immunohistochemistry; PD, protein diet; sgRNA, guide RNA; SIR, sirolimus.
